# Supplementary material
Source: Springer Nature journal article supplement (https://www.springermedizin.de/resource/supplementary/13052_2008_3_MOESM1_ESM.pdf/9671196)
Supplement: MOESM1 [file 9671196]

Neonate: Name..... Surname.....  
 Date of birth:..... Gestational age:..... Apgar Score:.....  
 Breastfeeding during distressing procedure:   
 Care and/or pacifier during distressing procedure:

|                                                                                                         | <b>Score</b> |
|---------------------------------------------------------------------------------------------------------|--------------|
| <b>Facial expressions:</b>                                                                              |              |
| Calm                                                                                                    | <b>0</b>     |
| Snivels and alternates gentle eye opening and closing                                                   | <b>1</b>     |
| Intensity of eye squeeze, brow bulge, nasolabial furrow:                                                |              |
| Mild, intermittent with return to calm (present during <1/3 of observation periods)                     | <b>2</b>     |
| Moderate (present during 1/3 to 2/3 of observation periods)                                             | <b>3</b>     |
| Very pronounced, continuous (present during >2/3 of observation periods)                                | <b>4</b>     |
| <b>Limbs movements</b>                                                                                  |              |
| Calm or gentle movements                                                                                | <b>0</b>     |
| Intensity of pedalling, toes spread, legs tensed and pulled up, agitation of arms, withdrawal reaction: |              |
| Mild, intermittent with return to calm (present during <1/3 of observation periods)                     | <b>1</b>     |
| Moderate (present during 1/3 to 2/3 of observation periods)                                             | <b>2</b>     |
| Very pronounced, continuous (present during >2/3 of observation periods)                                | <b>3</b>     |
| <b>Vocal expression</b>                                                                                 |              |
| No complaints                                                                                           | <b>0</b>     |
| Moans briefly (for intubated child, looks anxious or uneasy)                                            | <b>1</b>     |
| Intermittent crying (for intubated child, expression of intermittent crying)                            | <b>2</b>     |
| Longlasting crying, continuous howl (for intubated child, expression of continuous crying)              | <b>3</b>     |
| <b>Total score</b>                                                                                      |              |
